# Supplementary figures and images for: Reduction of Oxidative Stress and Inflammation by Blunting Daily Acute Glucose Fluctuations in Patients With Type 2 Diabetes: Role of dipeptidyl peptidase-IV inhibition
Source: PubMed Central journal article supplement — Diabetes Care. 2012 Sep 11;35(10):2076–82. doi: 10.2337/dc12-0199 (PMC3447848; doi:10.2337/dc12-0199), 2012-09-11

# SUPPLEMENTARY DATA

## Supplementary Figure 1. Study design

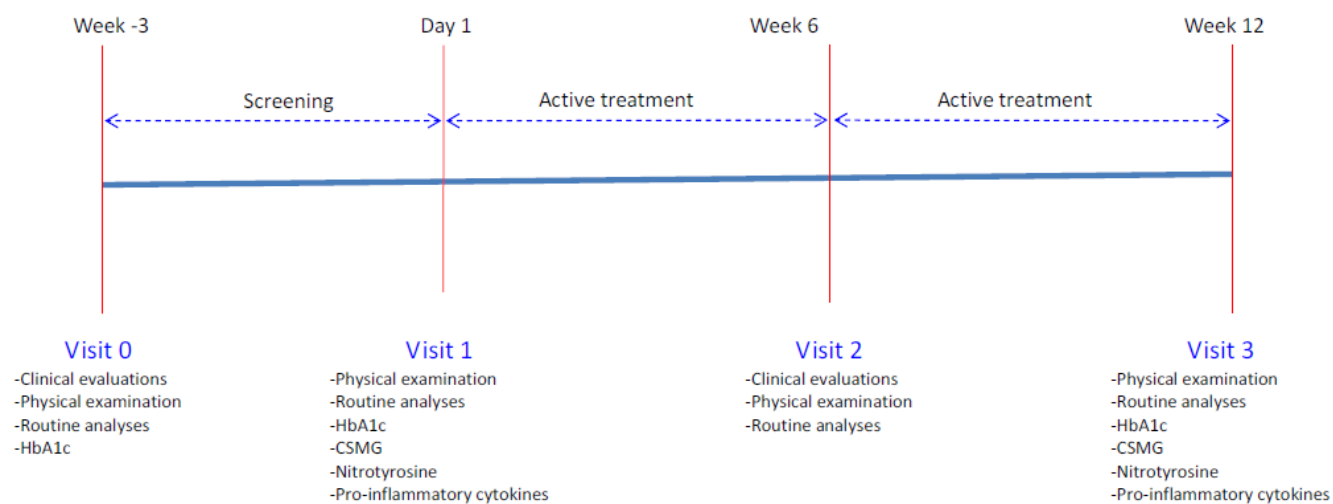

Supplement: supp_dc12-0199v120199_DC120199SupplementaryData.pdf [file supp_dc12-0199v120199_DC120199SupplementaryData.pdf]
